# Supplementary material for: In situcrosslinking of nanostructured block copolymer microparticles in supercritical carbon dioxide
Source: Royal Society of Chemistry journal article supplement (doi:10.1039/c9py00556k), 2019-01-01
Supplement: c9py00556k1.pdf [file c9py00556k1.pdf]

## Supporting Information

# *In situ* Crosslinking of Nanostructured Block Copolymer Microparticles in Supercritical Carbon Dioxide

Guping He,<sup>1</sup> Thomas M. Bennett,<sup>1</sup> Kartini Alias,<sup>1</sup> Long Jiang,<sup>2</sup> Simon T. Schwab,<sup>1</sup> Mohammad Alauhdin,<sup>1</sup> Steven M. Howdle<sup>1,\*</sup>

<sup>1</sup> School of Chemistry, University of Nottingham, Nottingham, NG7 2RD, United Kingdom

<sup>2</sup> Interface and Surface Analysis Centre, University of Nottingham, Nottingham, NG7 2RD, United Kingdom

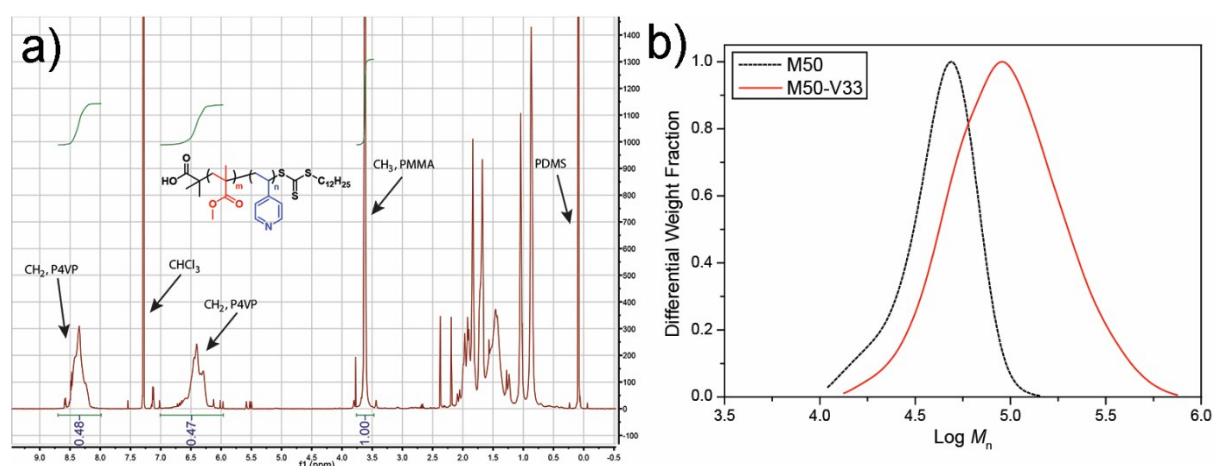

**SI Fig. 1.** (a) <sup>1</sup>H NMR spectrum of non-crosslinked **M50-V33**, enabling the proportion of P4VP to be calculated. (b) GPC molecular weight distribution data (normalised to peak height) for the PMMA first block (**M50**) and the final block copolymer (**M50-V33**) after chain extension with P4VP.

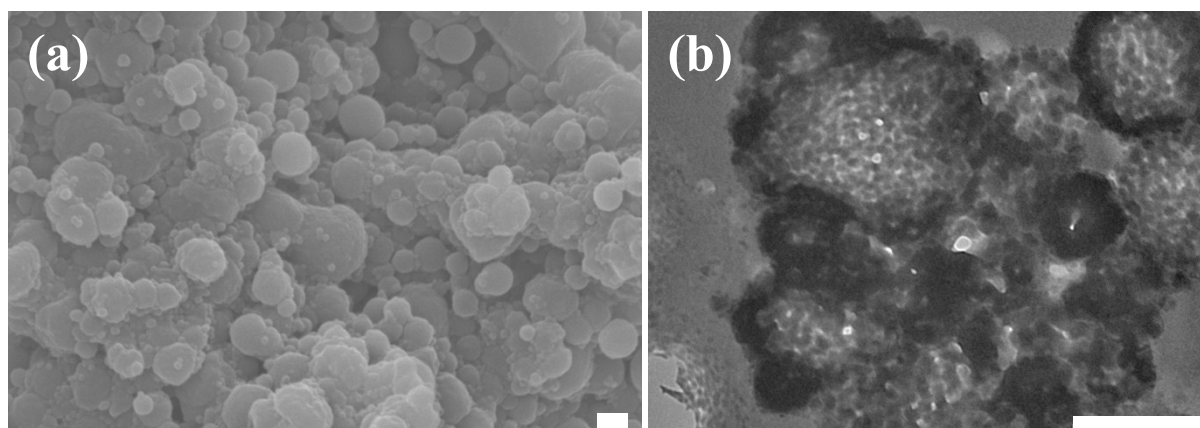

SI Fig. 2. SEM (a) and TEM images (b) of M50-V33/D1. Scale bar represents 500 nm.

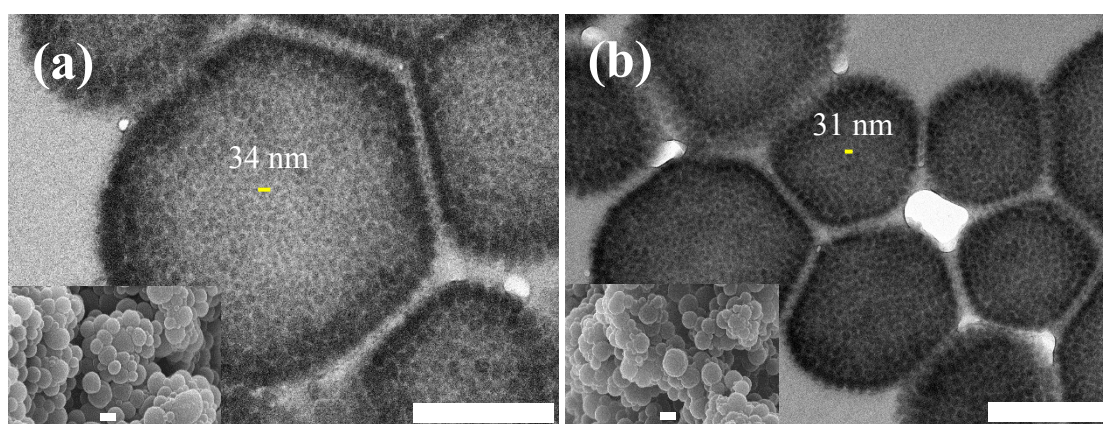

SI Fig. 3. SEM (inserts) and TEM images of (a) M50-V<sub>17</sub>-V<sub>216</sub>/D2 and (b) M50-V<sub>17</sub>-V<sub>216</sub>/D4. Scale bar represents 500 nm in the cross-sections and 1 μm in the inserts.

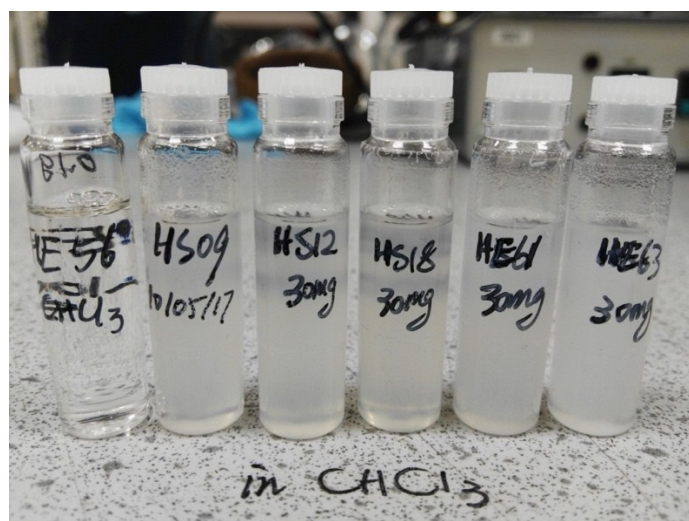

SI Fig. 4. Photographic image of the samples dispersed in chloroform. From left to right: M50-V33, M50-V33/D1, M50-V33/D0.5, M50-V<sub>17</sub>-V<sub>216</sub>/D1, M200-V<sub>180</sub>-V<sub>252</sub>/D4, M50-V<sub>120</sub>-V<sub>213</sub>/D8.

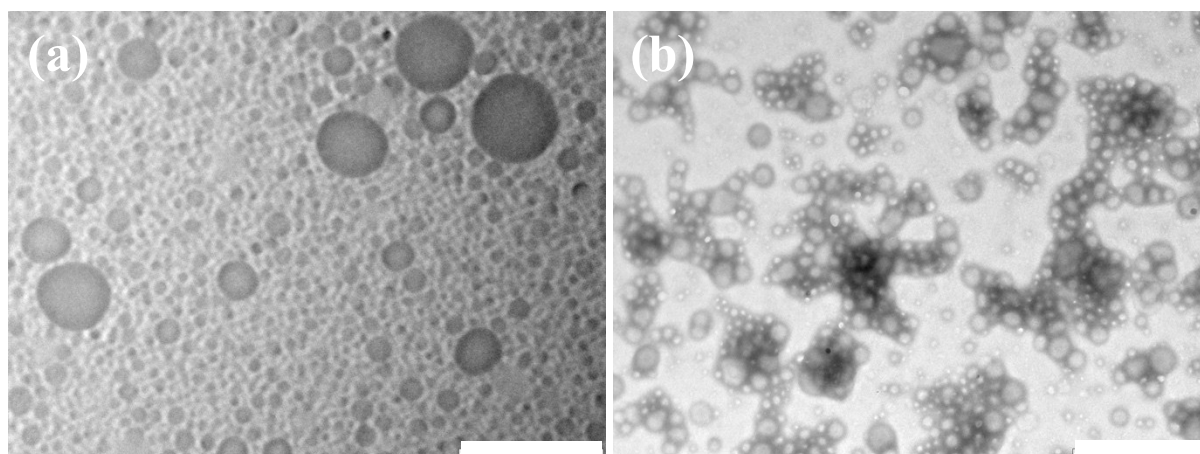

**SI Fig. 5.** TEM images of **M50-V33** at a concentration of 2 mg/ml in THF. Samples were stained with  $I_2$  vapour for 2 h. The scale bar in both images is 500 nm.

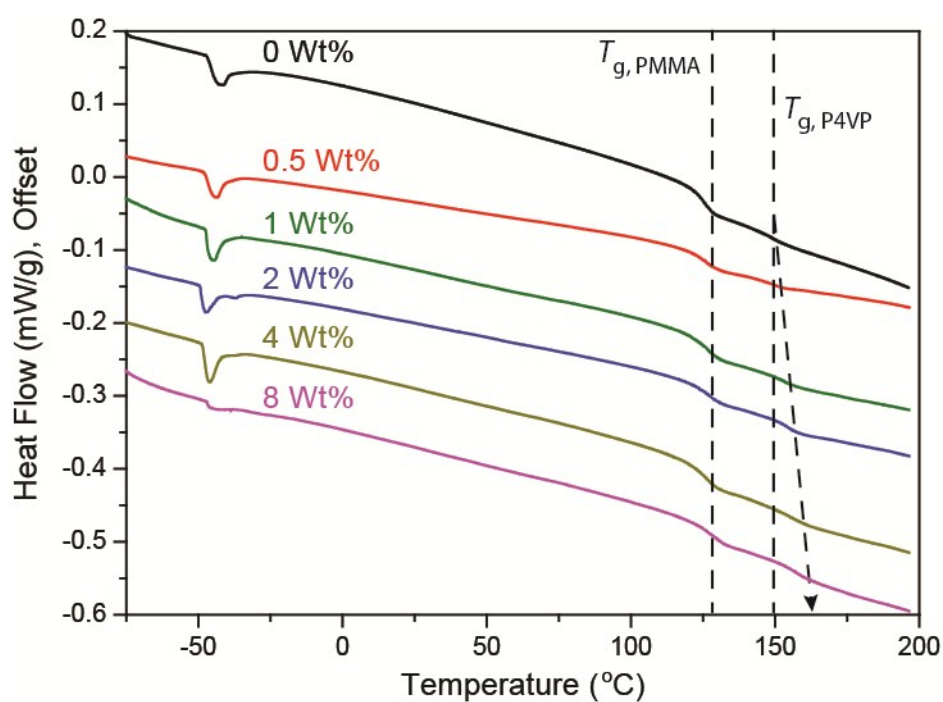

**SI Fig. 6.** DSC traces for the crosslinked PMMA-*b*-P4VP samples prepared via the two-step method. The lines show the positions of the  $T_g$  value of the non-crosslinked PMMA and P4VP BCP sample. The arrows highlights the increasing  $T_g$  values of the crosslinked P4VP domains.

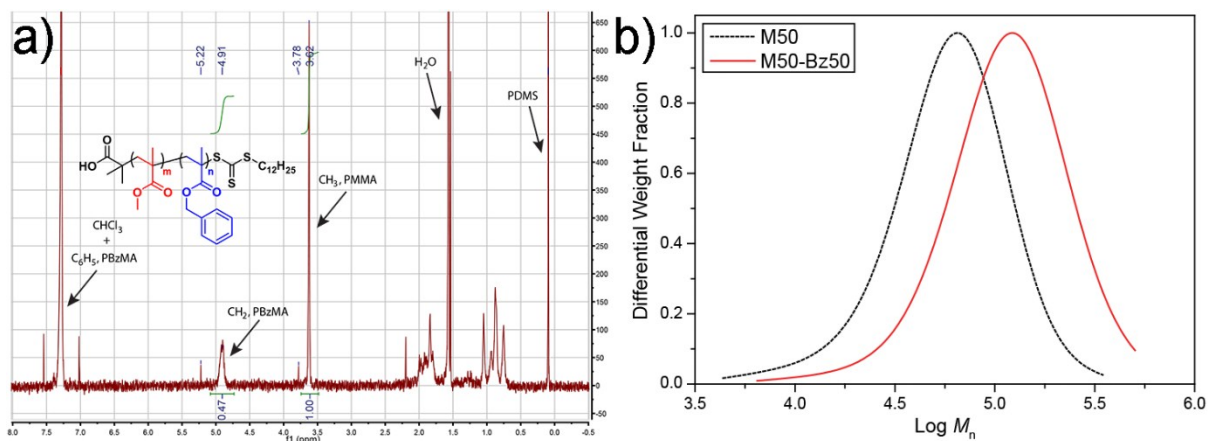

**SI Fig. 7.** (a)  $^1\text{H}$  NMR spectrum of non-crosslinked **M50-Bz50**, enabling the proportion of PBzMA to be calculated. (b) GPC molecular weight distribution data (normalised to peak height) for the first PMMA block (**M50**) and the final block copolymer (**M50-Bz50**) after chain extension with BzMA.

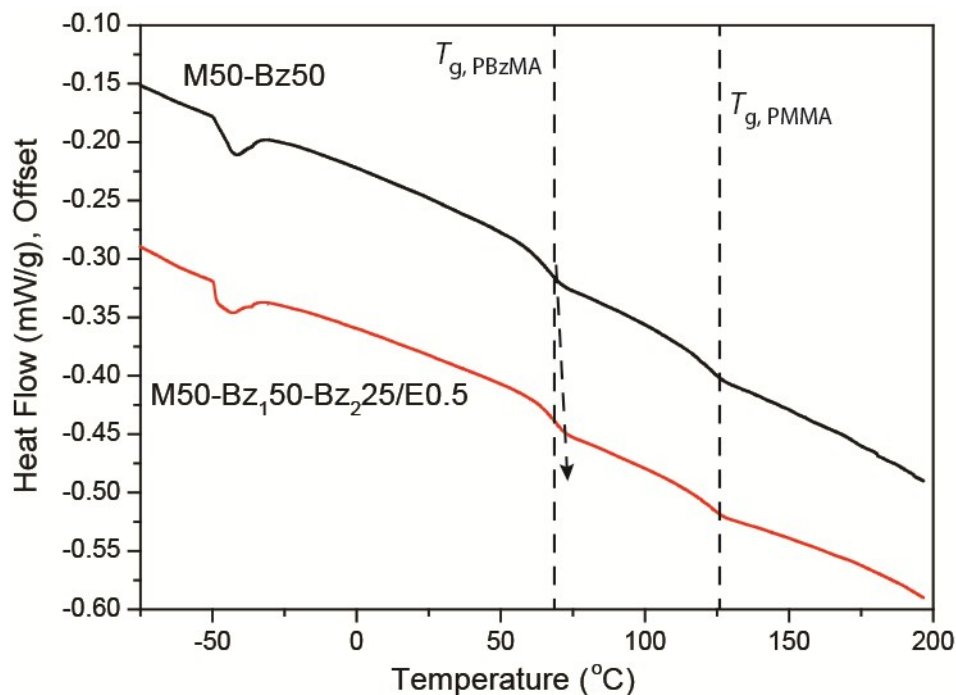

**SI Fig. 8.** DSC traces of **M50-Bz50** (black) and **M50-Bz<sub>150</sub>-Bz<sub>25</sub>/E0.5** (red).

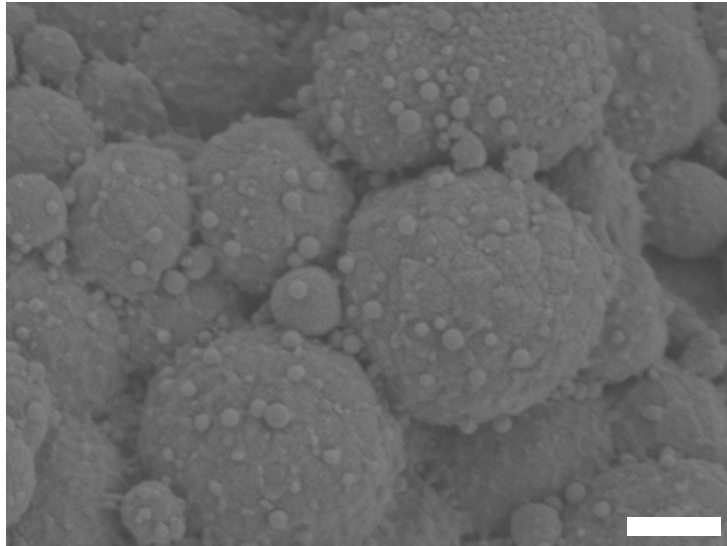

**SI Fig. 9.** SEM image of the **M50-V<sub>1</sub>20-V<sub>2</sub>13/D8** microparticles after swelling in ethanol. The scale bar represents 500 nm.
